# Supplementary material for: Longer-Term Weight Loss Outcomes Are Not Primarily Driven by Diet Following Roux-en-Y Gastric Bypass and Sleeve Gastrectomy
Source: MDPI journal article supplement (doi:10.3390/nu15153323), 2023-07-26
Supplement: s1 [file s1]

# Supplementary Material

**Table S1.** Study enrollment criteria.

| <b>Inclusion Criteria</b>                                                                                                                                                                                     | <b>Method of Assessment</b> |
|---------------------------------------------------------------------------------------------------------------------------------------------------------------------------------------------------------------|-----------------------------|
| Male or Female between the ages of 18-65 years, inclusive                                                                                                                                                     | Photo Identification        |
| In evaluation for Roux-en-Y Gastric Bypass or Sleeve Gastrectomy as primary procedure                                                                                                                         | Surgery Department          |
| Planning to be available for two years of follow-up after surgery                                                                                                                                             | Self-report                 |
| <b>Exclusion Criteria</b>                                                                                                                                                                                     | <b>Method of Assessment</b> |
| Alcohol or substance use disorder in the past year                                                                                                                                                            | Structured Interview        |
| Severe psychiatric disorder that may affect the ability of the participant's ability to comply with the protocol                                                                                              | Structured Interview        |
| Tobacco use in the prior year                                                                                                                                                                                 | Self-report                 |
| Current medication known to significantly influence gastrointestinal transit time (e.g., opioids, glp-1 agonists, metoclopramide) or is being taken routinely for weight loss (e.g., phentermine, topiramate) | Medical History             |
| Use of any oral or injectable antibiotic in the past month                                                                                                                                                    | Medical History             |
| Use of commercially available prebiotic or probiotic in the past month                                                                                                                                        | Medical History             |
| History of significant intestinal disease or disorder that would influence the microbiome (e.g., Crohn's Disease, etc.)                                                                                       | Medical History             |
| History of significant gastrointestinal surgery that would influence the microbiome, not including cholecystectomy or appendectomy                                                                            | Medical History             |
| Inability to engage in physical activity or dietary monitoring or any medical condition that would put the participant at risk in the study                                                                   | Self-report                 |
| Positive urine drug screen for a non-prescribed medication                                                                                                                                                    | Urine drug screen           |
| Pregnancy or breast feeding                                                                                                                                                                                   | Self-report                 |

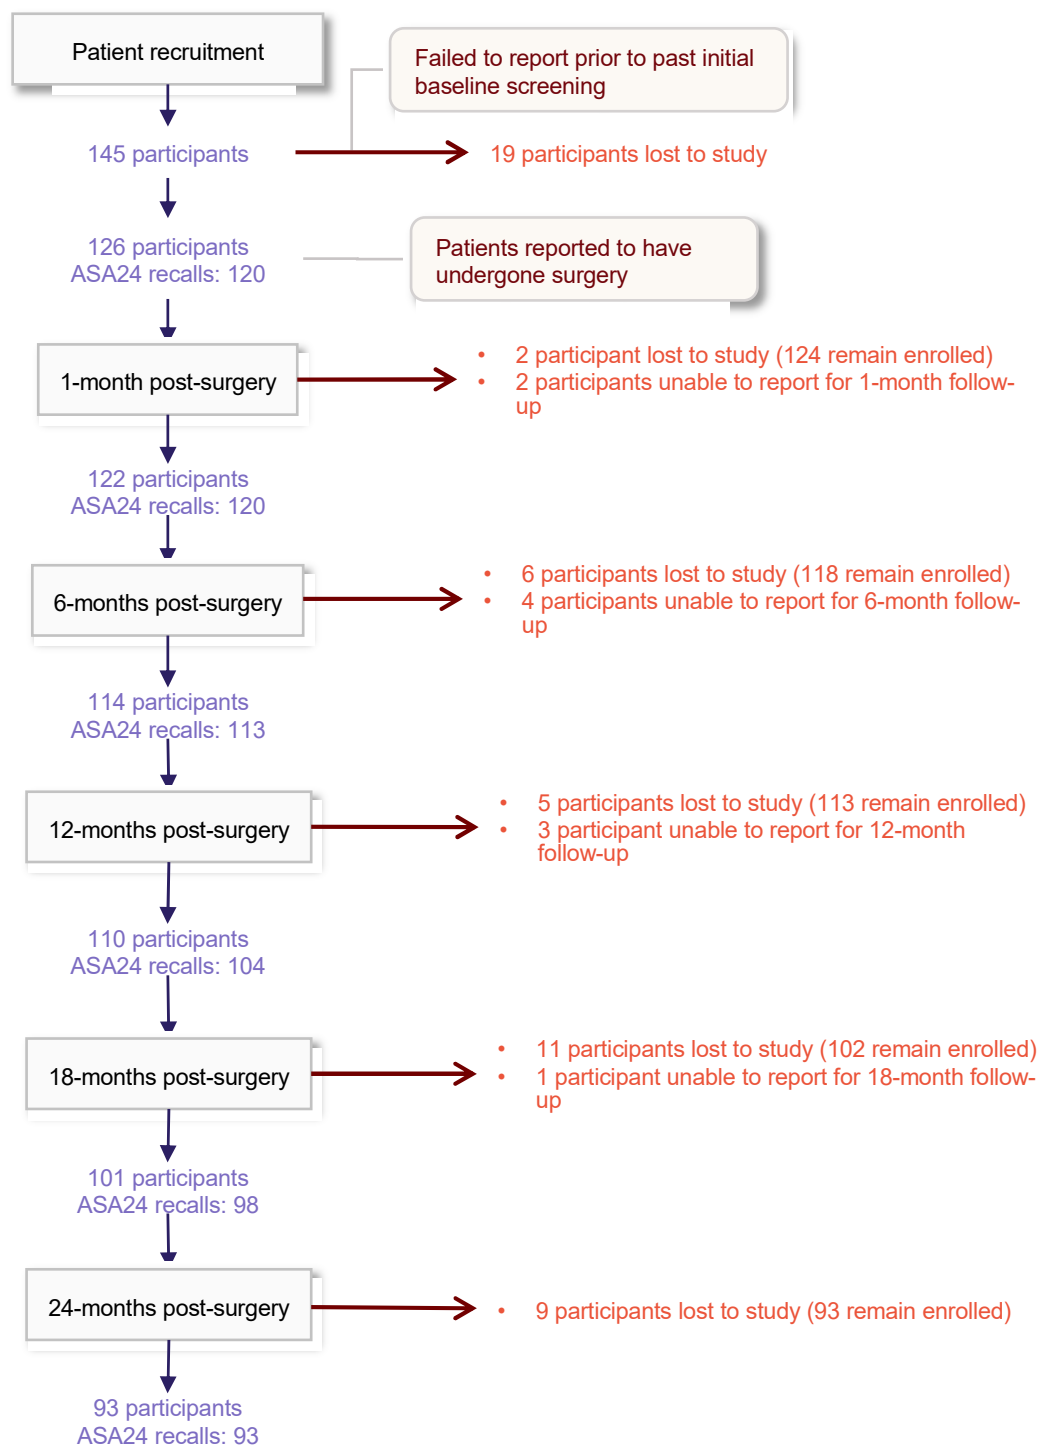

**Figure S1.** Infographic for participant attrition.

**Table S2.** Baseline demographics for all participants.

| <b>Variable</b>                  | <b>Total (n = 124)</b> |              |
|----------------------------------|------------------------|--------------|
| Age (years)                      | 42.8 ± 10.2            |              |
| <u>Location</u>                  |                        |              |
| Cleveland                        | 64 (51.6%)             |              |
| Fargo                            | 60 (48.4%)             |              |
| <u>Sex</u>                       |                        |              |
| Female                           | 100 (80.6%)            |              |
| Male                             | 24 (19.4%)             |              |
| <u>Type of Surgery</u>           |                        |              |
| Gastric Bypass                   | 87 (70.2%)             |              |
| Sleeve Gastrectomy               | 37 (29.8%)             |              |
| <u>Ethnicity</u>                 |                        |              |
| Black or African American        | 23 (18.5%)             |              |
| Caucasian                        | 92 (74.2%)             |              |
| Hispanic or Latino               | 2 (1.6%)               |              |
| Native Hawaiian/Pacific Islander | 1 (0.8%)               |              |
| More than one race               | 6 (4.8%)               |              |
| <u>Baseline Metrics</u>          | <u>RYGB</u>            | <u>SG</u>    |
| Weight (kg)                      | 129.5 ± 21.6           | 136.7 ± 32.0 |
| BMI (kg/m <sup>2</sup> )         | 45.3 ± 5.7             | 47.5 ± 8.9   |

Data are reported as mean ± SD for continuous variables and *n* (%) for categorical variables.

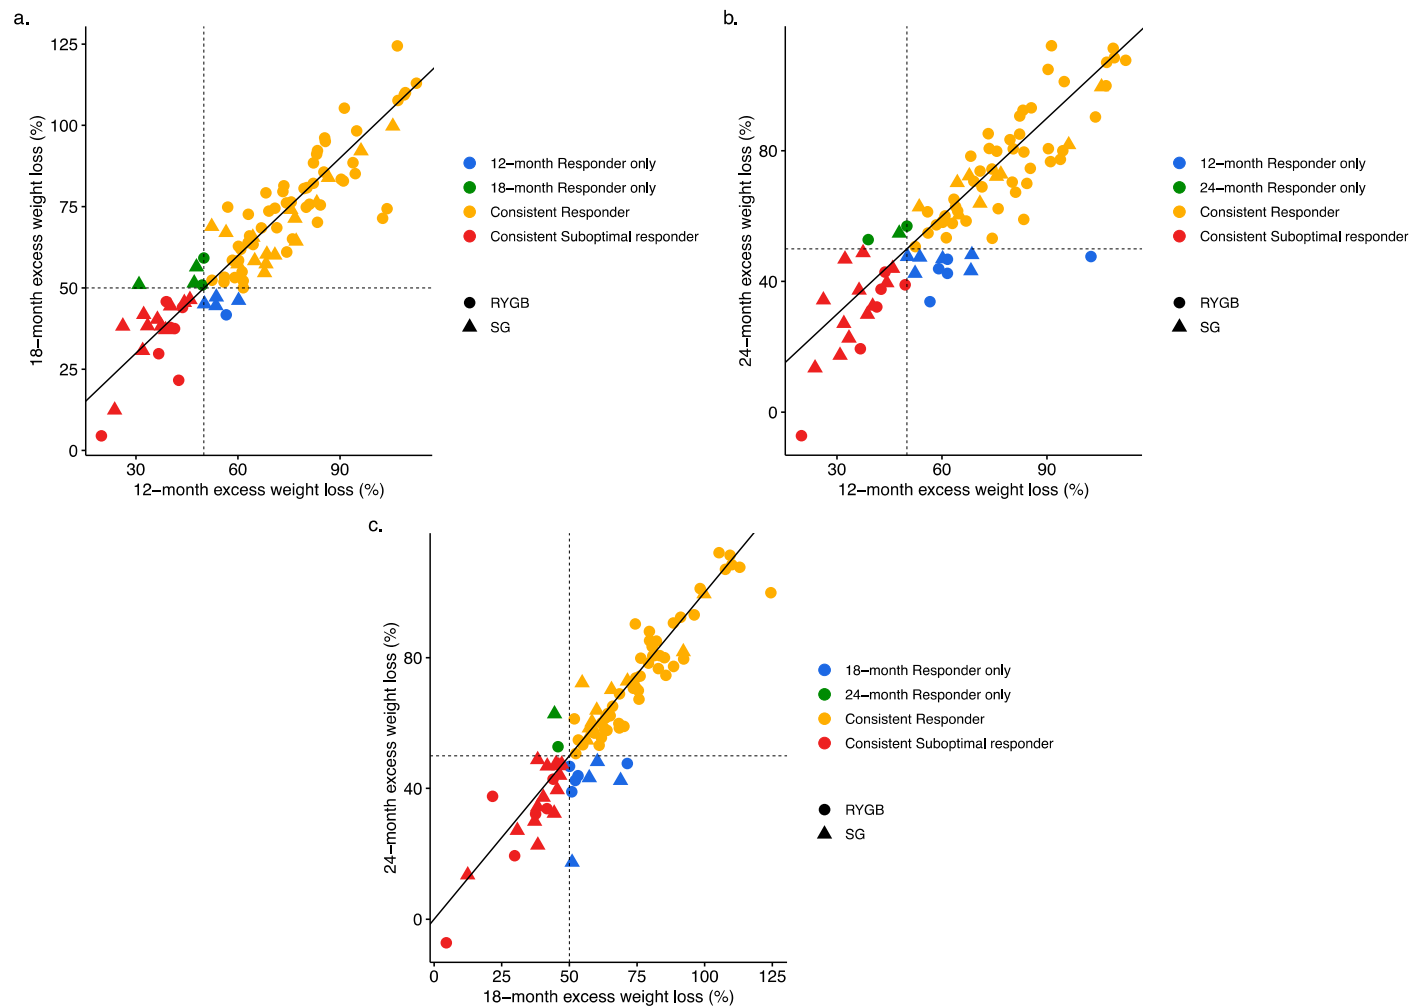

**Figure S2.** Patient excess weight loss (%) from baseline weight at (a) 12-month v 18-month (Spearman  $p < 0.001$ ;  $r = 0.92$ ), (b) 12-month v 24-month ( $p < 0.001$ ;  $r = 0.88$ ), and (c) 18-month v 24-month ( $p < 0.001$ ;  $r = 0.92$ ). The dashed lines correspond to the 50% EWL response criterium. The solid black line corresponds to the identity line. Points are colored by patient outcome classification consistency and shapes represent patient surgery type.

**Table S3.** Differences in dietary intake between RYGB and SG patients.

a. Differences in dietary intake between RYGB and SG patients at each timepoint.

|                  | Energy (kcal)    |                  |                 | Carbohydrates (g)      |                         |                 | Protein (g)           |                       |                 | Total fat (g)         |                         |                 |
|------------------|------------------|------------------|-----------------|------------------------|-------------------------|-----------------|-----------------------|-----------------------|-----------------|-----------------------|-------------------------|-----------------|
|                  | RYGB             | SG               | <i>p</i> -value | RYGB                   | SG                      | <i>p</i> -value | RYGB                  | SG                    | <i>p</i> -value | RYGB                  | SG                      | <i>p</i> -value |
| Baseline         | 1867.34 ± 771.65 | 1888.68 ± 904.16 | 0.628           | 189.66 ± 81.61 (42.5%) | 219.93 ± 160.32 (47.8%) | 0.993           | 98.11 ± 41.13 (24.8%) | 134.52 ± 127.69 (34%) | 0.299           | 86.81 ± 51.88 (46.6%) | 126.02 ± 132.26 (67.1%) | 0.231           |
| Postop 1 month   | 695.34 ± 281.61  | 804.36 ± 292.1   | 0.066           | 60.92 ± 48.25 (35.7%)  | 65.07 ± 52.81 (32.1%)   | 0.984           | 57.74 ± 39.7 (34.6%)  | 69.05 ± 41.65 (36.2%) | 0.034           | 31.48 ± 36.22 (42.4%) | 41.52 ± 41.95 (46.9%)   | 0.016           |
| Postop 6 month   | 1047.58 ± 430.56 | 1140.78 ± 479.64 | 0.297           | 94.79 ± 59.89 (35.8%)  | 96.33 ± 64.76 (33.1%)   | 0.983           | 70.01 ± 45.58 (28.2%) | 85.01 ± 52.69 (32.1%) | 0.046           | 49.79 ± 42.89 (42.7%) | 57.87 ± 45.18 (46.2%)   | 0.266           |
| Postop 12 month  | 1216.3 ± 400.05  | 1230.09 ± 525.16 | 0.582           | 116.97 ± 57.96 (37.8%) | 100.9 ± 65.83 (30.6%)   | 0.109           | 73.3 ± 37.63 (25.2%)  | 77.12 ± 26.12 (27.1%) | 0.219           | 55.54 ± 34.7 (40.7%)  | 55.88 ± 25.85 (41.2%)   | 0.981           |
| Postop 18 months | 1331.8 ± 525.44  | 1216.23 ± 463.51 | 0.386           | 129.89 ± 62.07 (38.5%) | 107.82 ± 53.51 (34.3%)  | 0.16            | 69.53 ± 23.51 (22.3%) | 73.03 ± 30.37 (25.1%) | 0.609           | 57.13 ± 25.49 (38.1%) | 51.84 ± 21.09 (38.9%)   | 0.377           |
| Postop 24 months | 1240.25 ± 454.72 | 1268.91 ± 574.29 | 0.878           | 120.22 ± 59.02 (41.1%) | 114.62 ± 76.56 (33.6%)  | 0.45            | 73.88 ± 41.62 (26.9%) | 74.44 ± 21.5 (26.8%)  | 0.409           | 58.35 ± 42.64 (47.9%) | 50.63 ± 22.65 (37.1%)   | 0.542           |

Data are reported as mean ± SD. *P*-values were computed by Wilcoxon's rank-sum test. Data in parentheses report the average energy ratio for each macronutrient intake.

b. Differences in dietary intake for RYGB and SG patients relative to baseline intake.

| Timepoint | RYGB     |               |             |           | SG       |               |             |           |
|-----------|----------|---------------|-------------|-----------|----------|---------------|-------------|-----------|
|           | Calories | Carbohydrates | Protein     | Total fat | Calories | Carbohydrates | Protein     | Total fat |
| BL – 1M   | 1.17E-40 | 1.06E-33      | 9.53E-11    | 3.86E-17  | 1.94E-13 | 5.85E-12      | 2.00E-05    | 7.21E-08  |
| BL – 6M   | 9.64E-22 | 1.36E-19      | 8.14E-06    | 2.37E-08  | 2.40E-07 | 4.48E-08      | 0.001322692 | 1.49E-05  |
| BL – 12M  | 1.13E-13 | 1.22E-11      | 0.000119676 | 4.43E-06  | 5.04E-06 | 1.77E-07      | 0.000210171 | 9.98E-06  |
| BL – 18M  | 2.40E-09 | 4.91E-08      | 1.32E-05    | 1.28E-05  | 5.22E-06 | 1.29E-06      | 9.59E-05    | 5.22E-06  |
| BL – 24M  | 3.17E-12 | 2.77E-10      | 0.000217192 | 3.36E-05  | 3.36E-05 | 8.13E-06      | 0.000217192 | 8.13E-06  |

*P*-values were computed by univariate linear regression and adjusted using the BH procedure.

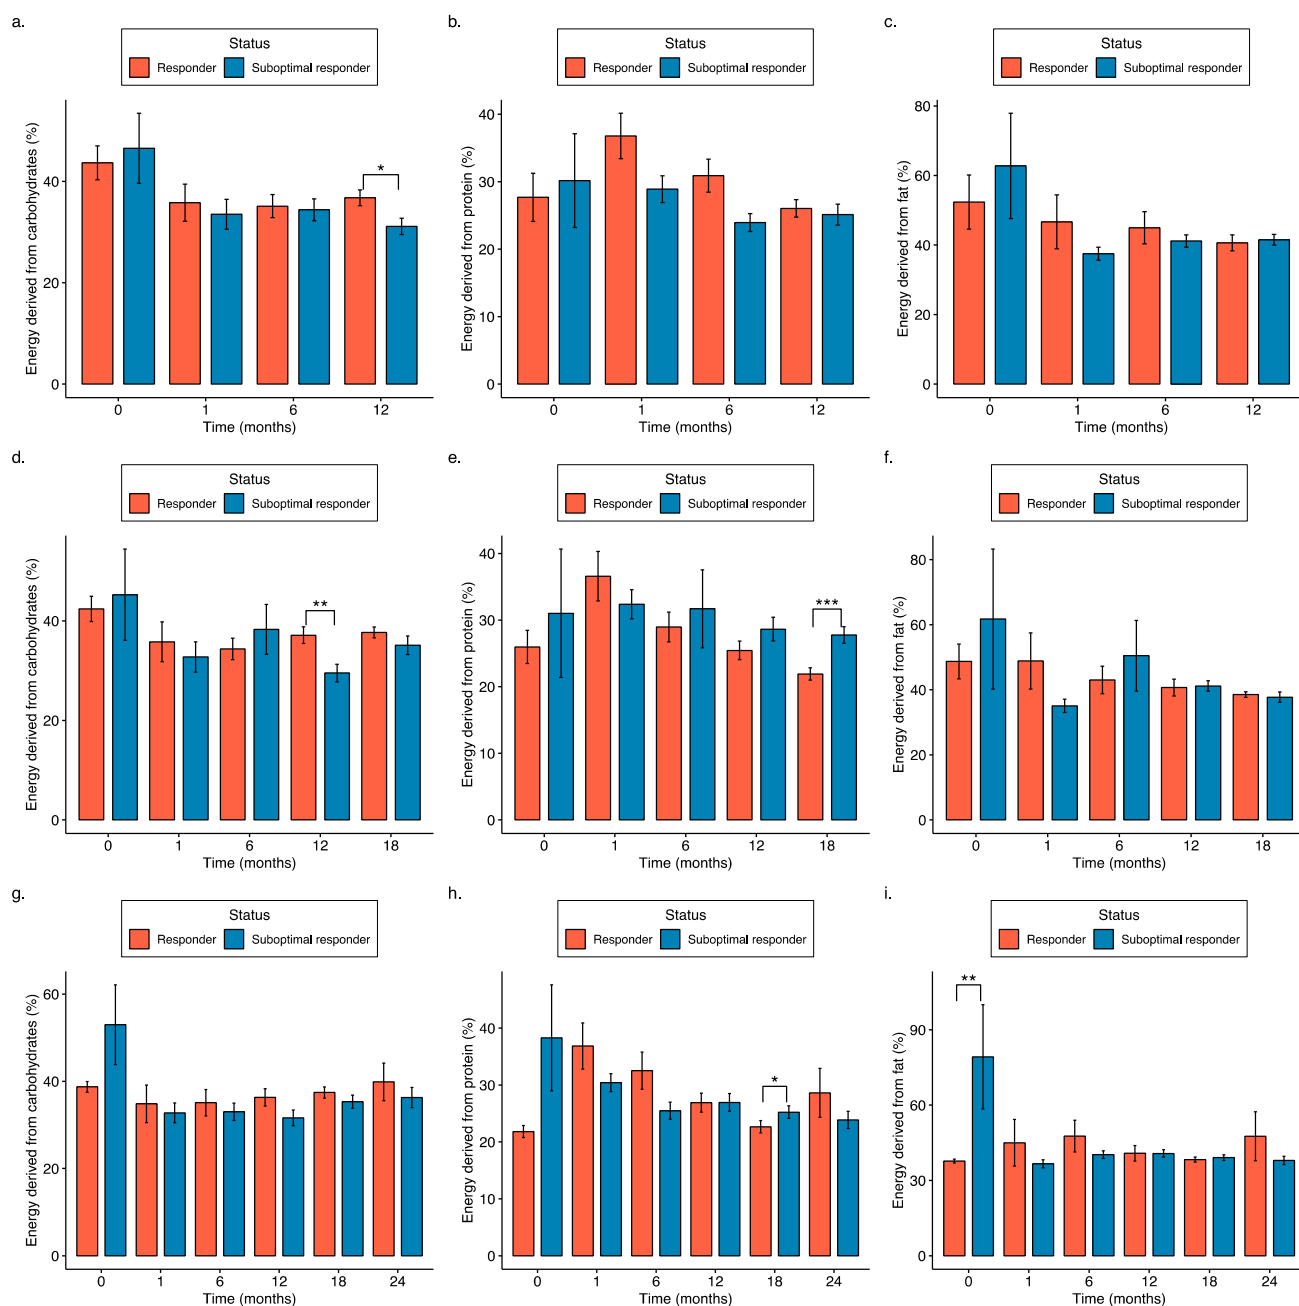

**Figure S3.** Energy ratio comparisons between outcome groups when classified at 12-months (a-c), 18-months (d-f), and 24-months (g-i) post-surgery. Data are presented as means  $\pm$  standard errors. Statistical differences are analyzed by Wilcoxon's rank-sum test. \* indicates  $p < 0.05$ , \*\* indicates  $p < 0.01$ , and \*\*\* indicates  $p < 0.001$  responder versus suboptimal responder.

**Table S4.** Comparison of nutrition intake between groups for patients characterized as responders vs. suboptimal responders at 18 months post-surgery.

|                     |                   | Responder        | Suboptimal responder | R <sup>2</sup> | <i>p</i> -value          |
|---------------------|-------------------|------------------|----------------------|----------------|--------------------------|
|                     |                   | ( <i>n</i> = 78) | ( <i>n</i> = 23)     |                |                          |
| Baseline            | Weight (kg)       | 125.68 ± 22.74   | 145.23 ± 31.02       | 0.1            | <b>0.003</b>             |
|                     | Energy (kcal)     | 1808.77 ± 773.15 | 1984.93 ± 804.29     | 0.009          | 0.402                    |
|                     | Carbohydrates (g) | 188.42 ± 96.05   | 216.43 ± 158.49      | 0.011          | 0.997                    |
|                     |                   | (42.4%)          | (45.3%)              |                |                          |
|                     | Protein (g)       | 103.8 ± 61.56    | 128.95 ± 138.25      | 0.015          | 0.144                    |
|                     |                   | (26%)            | (31%)                |                |                          |
|                     | Total fat (g)     | 93.02 ± 71.59    | 118.03 ± 139.17      | 0.013          | 0.18                     |
|                     |                   | (48.7%)          | (61.7%)              |                |                          |
| Postop<br>1 month   | Weight (kg)       | 109.37 ± 18.54   | 130.85 ± 28.84       | 0.156          | <b>&lt;0.001</b>         |
|                     | Energy (kcal)     | 690.77 ± 277.94  | 852.43 ± 232.15      | 0.062          | <b>0.003</b>             |
|                     | Carbohydrates (g) | 61.88 ± 55.06    | 69.45 ± 38.19        | 0.004          | 0.107                    |
|                     |                   | (35.8%)          | (32.8%)              |                |                          |
|                     | Protein (g)       | 60.02 ± 46.67    | 67.96 ± 25.15        | 0.006          | <b>0.029<sup>A</sup></b> |
|                     |                   | (36.6%)          | (32.4%)              |                |                          |
|                     | Total fat (g)     | 35.84 ± 46.42    | 33.97 ± 15.5         | <0.001         | 0.31                     |
|                     |                   | (48.9%)          | (35.1%)              |                |                          |
| Postop<br>6 months  | Weight (kg)       | 91.86 ± 16.93    | 117.64 ± 25.95       | 0.242          | <b>&lt;0.001</b>         |
|                     | Energy (kcal)     | 1024.27 ± 405.75 | 1288.53 ± 496.14     | 0.063          | <b>0.021<sup>A</sup></b> |
|                     | Carbohydrates (g) | 89.56 ± 57.4     | 119.33 ± 69.25       | 0.041          | 0.058 <sup>A</sup>       |
|                     |                   | (34.4%)          | (38.3%)              |                |                          |
|                     | Protein (g)       | 70.74 ± 46.81    | 94.61 ± 61.59        | 0.038          | <b>0.014</b>             |
|                     |                   | (29%)            | (31.7%)              |                |                          |
|                     | Total fat (g)     | 48.8 ± 42.99     | 68.95 ± 53.32        | 0.033          | <b>0.022<sup>A</sup></b> |
|                     |                   | (43%)            | (50.5%)              |                |                          |
| Postop<br>12 months | Weight (kg)       | 86.05 ± 16.4     | 116.49 ± 23.99       | 0.334          | <b>&lt;0.001</b>         |
|                     | Energy (kcal)     | 1197.46 ± 424.22 | 1309.02 ± 501.45     | 0.012          | 0.548 <sup>A</sup>       |
|                     | Carbohydrates (g) | 114.47 ± 62.45   | 102.35 ± 59.55       | 0.007          | 0.313 <sup>A</sup>       |
|                     |                   | (37.1%)          | (29.5%)              |                |                          |
|                     | Protein (g)       | 71.99 ± 36.89    | 87.46 ± 26.05        | 0.035          | <b>0.002<sup>A</sup></b> |
|                     |                   | (25.4%)          | (28.6%)              |                |                          |
|                     | Total fat (g)     | 54.39 ± 34.57    | 60.34 ± 27.51        | 0.006          | 0.364 <sup>A</sup>       |
|                     |                   | (40.7%)          | (41.2%)              |                |                          |
| Postop<br>18 months | Weight (kg)       | 86.18 ± 15.96    | 117.51 ± 21.64       | 0.368          | <b>&lt;0.001</b>         |
|                     | Energy (kcal)     | 1307.61 ± 544.68 | 1247.25 ± 350.57     | 0.002          | 0.922                    |
|                     | Carbohydrates (g) | 126.52 ± 63.97   | 109.43 ± 42.45       | 0.014          | 0.252                    |
|                     |                   | (37.7%)          | (35.1%)              |                |                          |
|                     | Protein (g)       | 66.52 ± 24.52    | 85.02 ± 25.69        | 0.09           | <b>0.004</b>             |
|                     |                   | (21.9%)          | (27.8%)              |                |                          |
|                     | Total fat (g)     | 56.07 ± 25.31    | 53.11 ± 20.03        | 0.003          | 0.724                    |
|                     |                   | (38.5%)          | (37.7%)              |                |                          |

Data are reported as mean ± SD. *P*-values were computed by Wilcoxon's rank-sum test. Data in parentheses report the average energy ratio for each macronutrient intake. R<sup>2</sup> was calculated by univariate linear models. Bold *p* values indicate *p* < 0.05 responder versus suboptimal responder. <sup>A</sup> corresponds with significant comparisons observed by Lim et al. (2020).

**Table S5.** Comparison of nutrition intake between outcome groups at 12 months post-surgery. The sample size was limited to those patients who participated for the entirety of the study.

|                     |                   | Responder                  | Suboptimal responder      | R <sup>2</sup> | <i>p</i> -value          |
|---------------------|-------------------|----------------------------|---------------------------|----------------|--------------------------|
|                     |                   | ( <i>n</i> = 69)           | ( <i>n</i> = 21)          |                |                          |
| Baseline            | Weight (kg)       | 126.01 ± 21.13             | 146.67 ± 31.57            | 0.127          | <b>0.004</b>             |
|                     | Energy (kcal)     | 1809.5 ± 684.94            | 1887.69 ± 783.98          | 0.002          | 0.805                    |
|                     | Carbohydrates (g) | 191.25 ± 117.75<br>(41.7%) | 203.48 ± 107.7<br>(47.9%) | 0.002          | 0.589                    |
|                     | Protein (g)       | 104.8 ± 88.73<br>(25.5%)   | 118.73 ± 75.59<br>(32.6%) | 0.005          | 0.209                    |
|                     | Total fat (g)     | 90.69 ± 90.82<br>(46.6%)   | 111.26 ± 76.99<br>(66.8%) | 0.01           | 0.085                    |
| Postop<br>1 month   | Weight (kg)       | 110.27 ± 18.12             | 130.76 ± 29.13            | 0.173          | <b>0.001</b>             |
|                     | Energy (kcal)     | 669.9 ± 238.59             | 932.39 ± 310.73           | 0.161          | <b>&lt;0.001</b>         |
|                     | Carbohydrates (g) | 55.97 ± 45.43<br>(33.9%)   | 82.23 ± 47.99<br>(34.7%)  | 0.056          | <b>0.007</b>             |
|                     | Protein (g)       | 59.33 ± 41.28<br>(36.8%)   | 64.42 ± 23.15<br>(28.9%)  | 0.003          | 0.170 <sup>Δ</sup>       |
|                     | Total fat (g)     | 31.49 ± 39.02<br>(44.5%)   | 38.42 ± 17.98<br>(36.4%)  | 0.007          | <b>0.02</b>              |
| Postop<br>6 months  | Weight (kg)       | 91.16 ± 14.14              | 120.43 ± 26.51            | 0.331          | <b>&lt;0.001</b>         |
|                     | Energy (kcal)     | 1009.64 ± 429.35           | 1316.72 ± 497.32          | 0.077          | <b>0.010<sup>Δ</sup></b> |
|                     | Carbohydrates (g) | 88.61 ± 64<br>(34.7%)      | 112.82 ± 59.37<br>(34%)   | 0.025          | <b>0.037<sup>Δ</sup></b> |
|                     | Protein (g)       | 77.27 ± 58.3<br>(32.2%)    | 76.97 ± 30.74<br>(23.7%)  | <0.001         | 0.391                    |
|                     | Total fat (g)     | 51.92 ± 52.6<br>(46.5%)    | 61.28 ± 26.7<br>(41.7%)   | 0.007          | <b>0.016<sup>Δ</sup></b> |
| Postop<br>12 months | Weight (kg)       | 85.28 ± 14.28              | 118.58 ± 23.99            | 0.413          | <b>&lt;0.001</b>         |
|                     | Energy (kcal)     | 1143.57 ± 426.84           | 1396.66 ± 472.81          | 0.058          | 0.064 <sup>Δ</sup>       |
|                     | Carbohydrates (g) | 107.97 ± 65.21<br>(36.1%)  | 112.72 ± 59.42<br>(30.9%) | 0.001          | 0.744 <sup>Δ</sup>       |
|                     | Protein (g)       | 73.28 ± 37.92<br>(27.3%)   | 84.63 ± 26.53<br>(25.6%)  | 0.018          | <b>0.021<sup>Δ</sup></b> |
|                     | Total fat (g)     | 52.06 ± 35.84<br>(40.7%)   | 64.45 ± 26.74<br>(41.2%)  | 0.024          | <b>0.035<sup>Δ</sup></b> |

Data are reported as mean ± SD. *P*-values were computed by Wilcoxon's rank-sum test. Data in parentheses report the average energy ratio for each macronutrient intake. R<sup>2</sup> was calculated by univariate linear models. Bold *p* values indicate *p* < 0.05 responder versus suboptimal responder. <sup>Δ</sup> corresponds with significant comparisons observed by Lim et al. (2020).



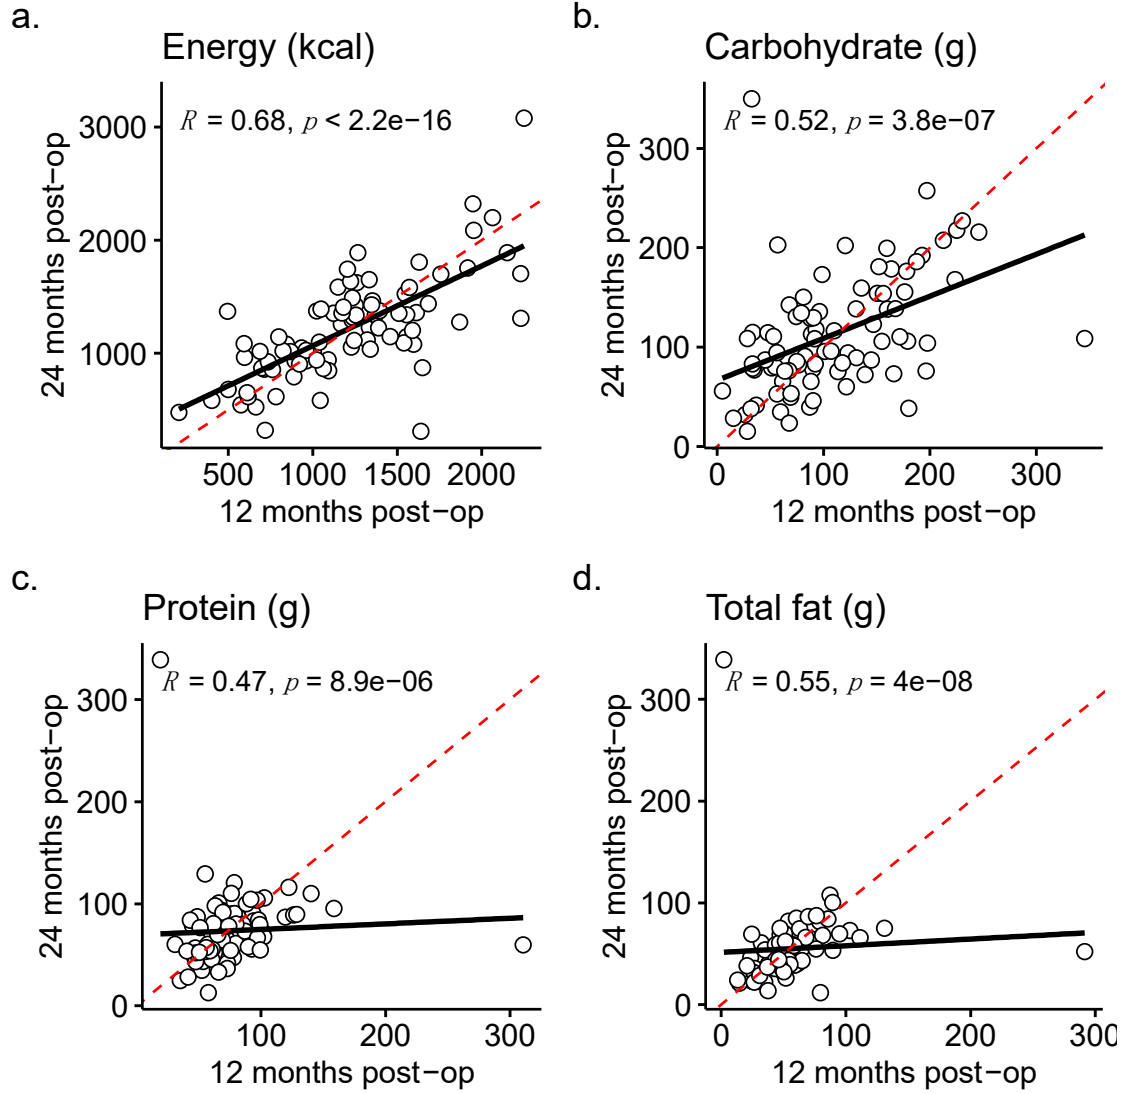

**Figure S4.** Dietary intake between 12 and 24 months (a) calories, (b) carbohydrates, (c) protein, (d) total fat. The dashed red line corresponds to the identity line. Correlation coefficients ( $r$ ) and  $p$ -values were calculated using Spearman's rank correlation.

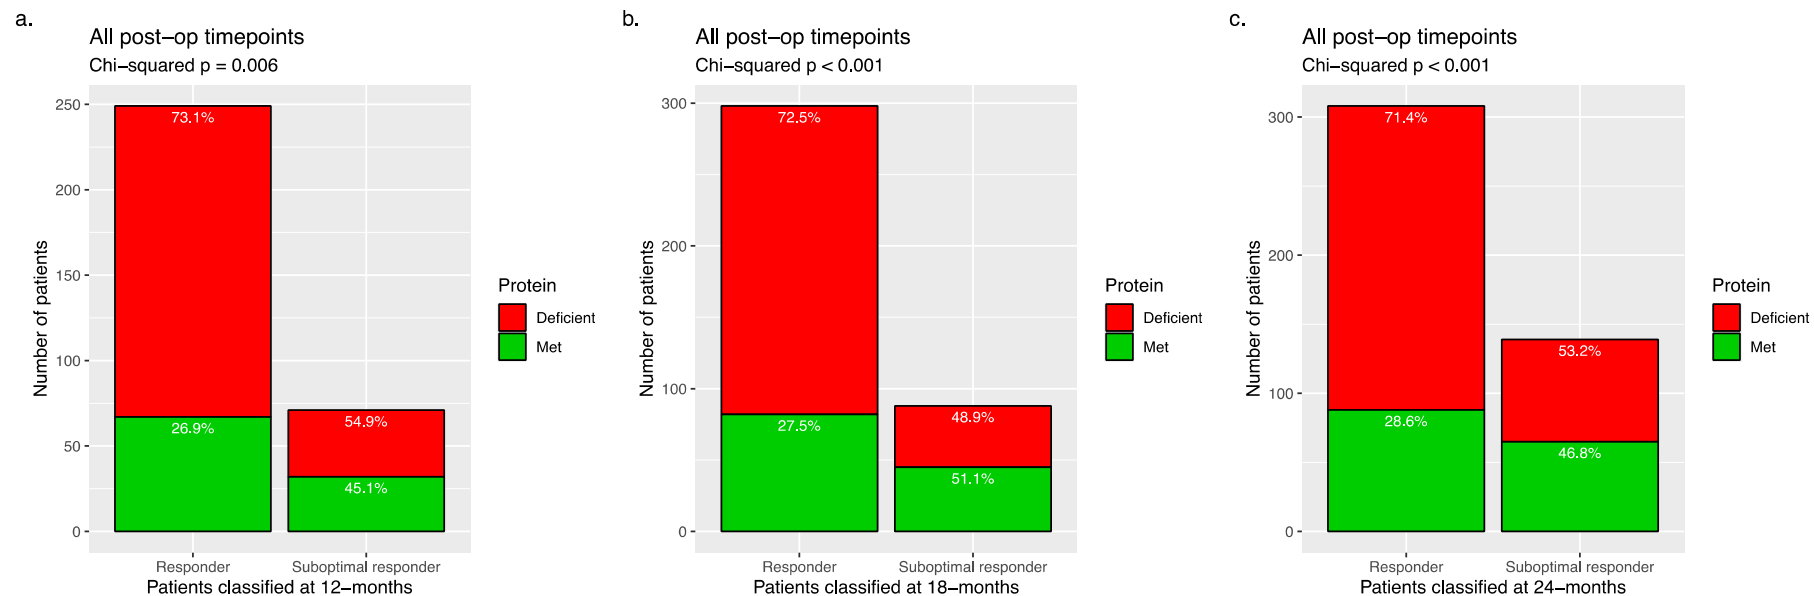

**Figure S5.** Proportion of responder and suboptimal responder patients consuming the recommended daily 1.1-1.5 g protein per kg ideal body weight when weight loss outcomes were classified at (a) 12-months, (b) 18-months, and (c) 24-months after surgery. Proportions were calculated by patients meeting the minimum recommended intake at each post-surgical assessment up to the month of weight loss outcome classifications.

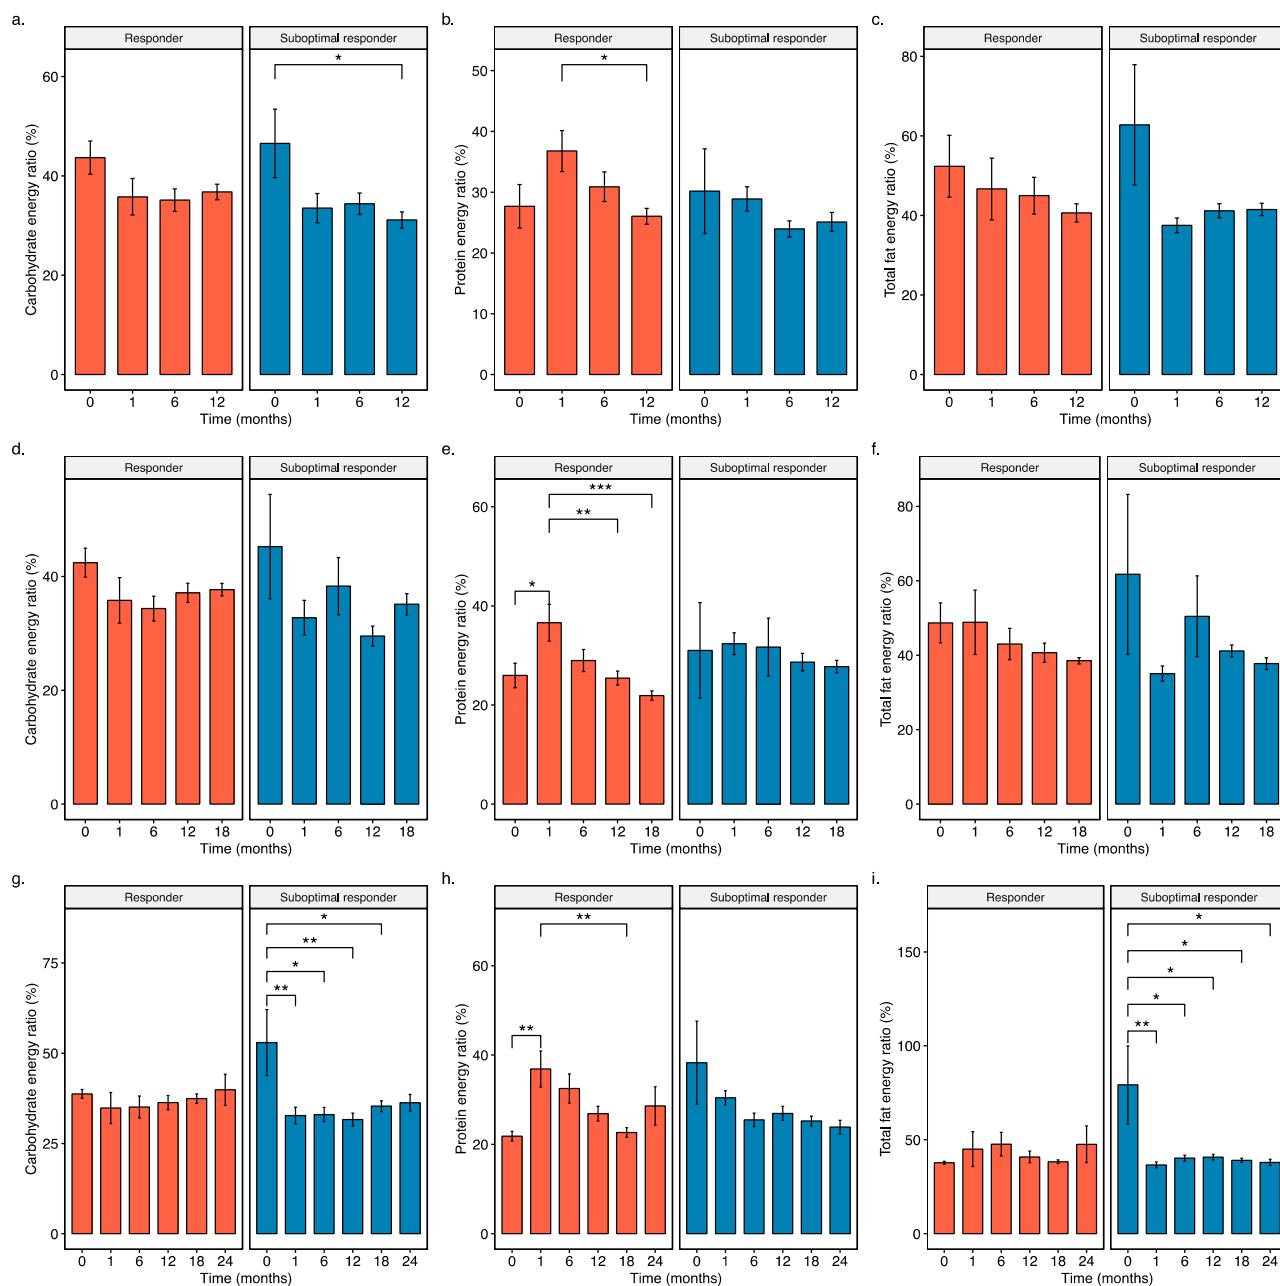

**Figure S6.** Energy ratio comparisons between outcome groups when classified at 12-months (a-c), 18-months (d-f), and 24-months (g-i) post-surgery. Data are presented as means  $\pm$  standard errors. Statistical differences are analyzed by Tukey's HSD test. \* indicates  $p < 0.05$ , \*\* indicates  $p < 0.01$ , and \*\*\* indicates  $p < 0.001$  between time points.
